# Supplementary material for: Replication confers β cell immaturity
Source: PubMed Central journal article supplement (PMC5797102; doi:10.1038/s41467-018-02939-0), 2018-02-02
Supplement: 41467_2018_2939_MOESM1_ESM.pdf [file 41467_2018_2939_MOESM1_ESM.pdf]

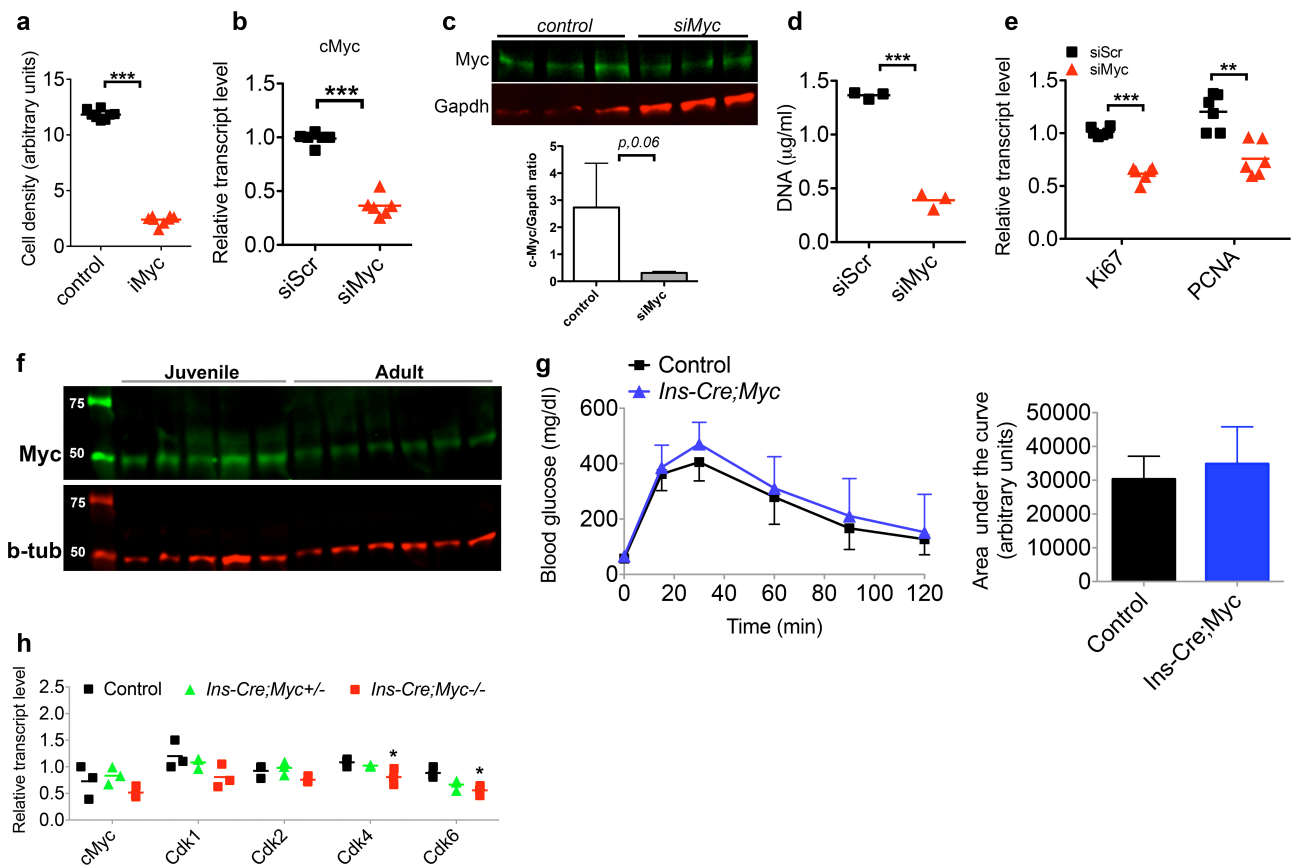

**Supplementary Figure 1. Inhibition of c-Myc activity.** **a.** INS-1 cells treated with Myci (40µM) show reduced cellular density after three days of treatment.  $n=8$  for each condition.  $***p < 0.0005$ , Student's  $t$  test. **b.** Transfection of INS-1 cell with siMyc for five days leads to a reduction in c-Myc expression by RNA quantification.  $n=6$  per condition.  $***p < 0.0005$ , Student's  $t$  test. **c.** siMyc transfection in INS-1 cells for five days leads to reduced c-Myc protein levels as compared to siScr. Gapdh was used as a housekeeping protein.  $n=3$  per condition. Error bars indicate  $\pm$  SD.  $p=0.06$ , Student's  $t$  test. **d.** siMyc transfection for five days leads to a reduction in cellular density in INS-1 cells.  $n=3$  per condition.  $***p < 0.0005$ , Student's  $t$  test. **e.** QPCR revealed reduced expression of *Ki67* and *Pcna* in siMyc-transfected samples after five days.  $n=6$  per condition.  $**p < 0.005$ ,  $***p < 0.0005$ , Student's  $t$  test. **f.** Western blotting shows reduced Myc expression in islets from adult (3 months old,  $n=6$ ) versus juvenile (3 weeks old,  $n=5$ ) wild type animals. Beta-tubulin was used as a loading control. **g.** Glucose challenge shows a trend towards mild glucose intolerance in 3-month-old animals lacking one or both alleles of c-Myc (*Ins-Cre;Myc*) as compared to controls. Error bars indicate  $\pm$  SD. **h.** QPCR analysis indicates a trend towards loss of cell cycle regulators in islets isolated from animals (3 months old) with either one (*Ins-Cre;Myc*<sup>+/-</sup>) or both (*Ins-Cre;Myc*<sup>-/-</sup>) alleles deleted in the  $\beta$  cells.  $n=3$  per group.  $*p < 0.05$ , Student's  $t$  test.

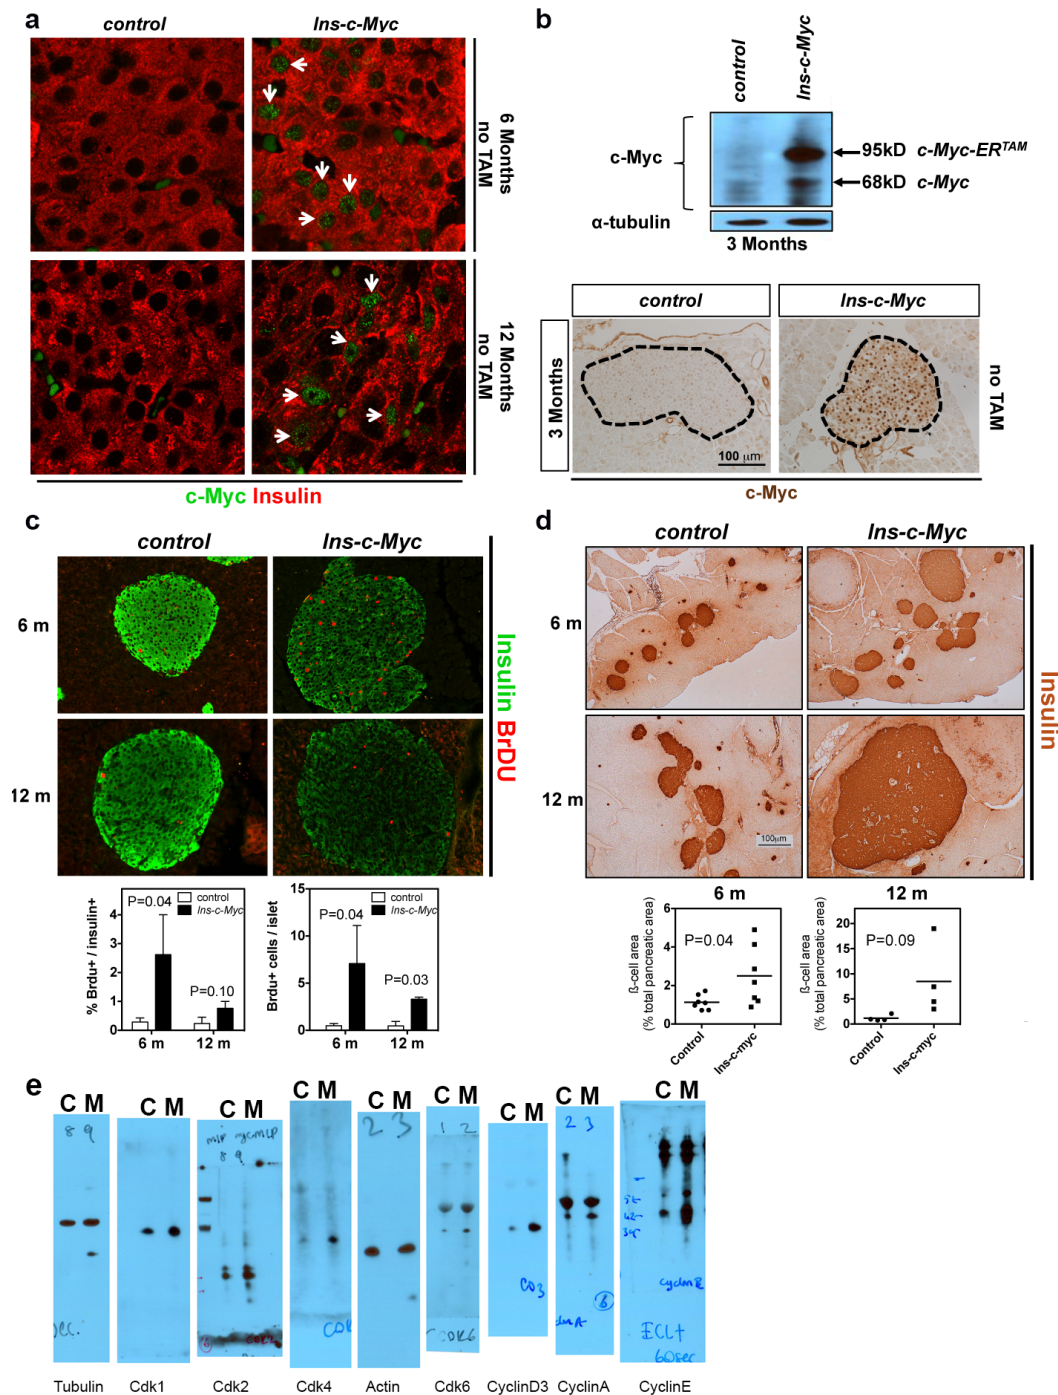

**Supplementary Figure 2.** **a.** Nuclear accumulation of c-Myc (green) in  $\beta$  cells (red) is readily detectable in animals at 6 and 12 months of age without administration of TAM. **b.** c-Myc-ER<sup>TAM</sup> fusion protein is detectable by western blotting and immunostaining in islets isolated from 3-month-old transgenic mice. **c.** BrdU incorporation (shown in red) is robust in  $\beta$  cells (shown in green) in older *Ins-c-Myc* transgenic animals. Quantification of BrdU incorporation shows increased replicative capacity in  $\beta$  cells in animals as old as one year. 6 months old, control=4, transgenic=4 animals, and 12 months old, control=2, transgenic=3 animals. Error bars indicate  $\pm$  SD. *P* value calculated using Student's *t* test. **d.** A significant increase in  $\beta$  cell mass occurs through the life of the transgenic animals as compared to control littermates. For quantification of  $\beta$  cell mass, 6 months old, control=7, transgenic=7 animals, and 12 months old, control=4, transgenic=4 animals were used. *P* value calculated using Student's *t* test. **e.** Original western blots shown for cell cycle proteins (Cdk2, Cdk4, CyclinD3, CyclinA and CyclinE), loading controls Tubulin and Actin, and a representative blot shown for Cdk1.

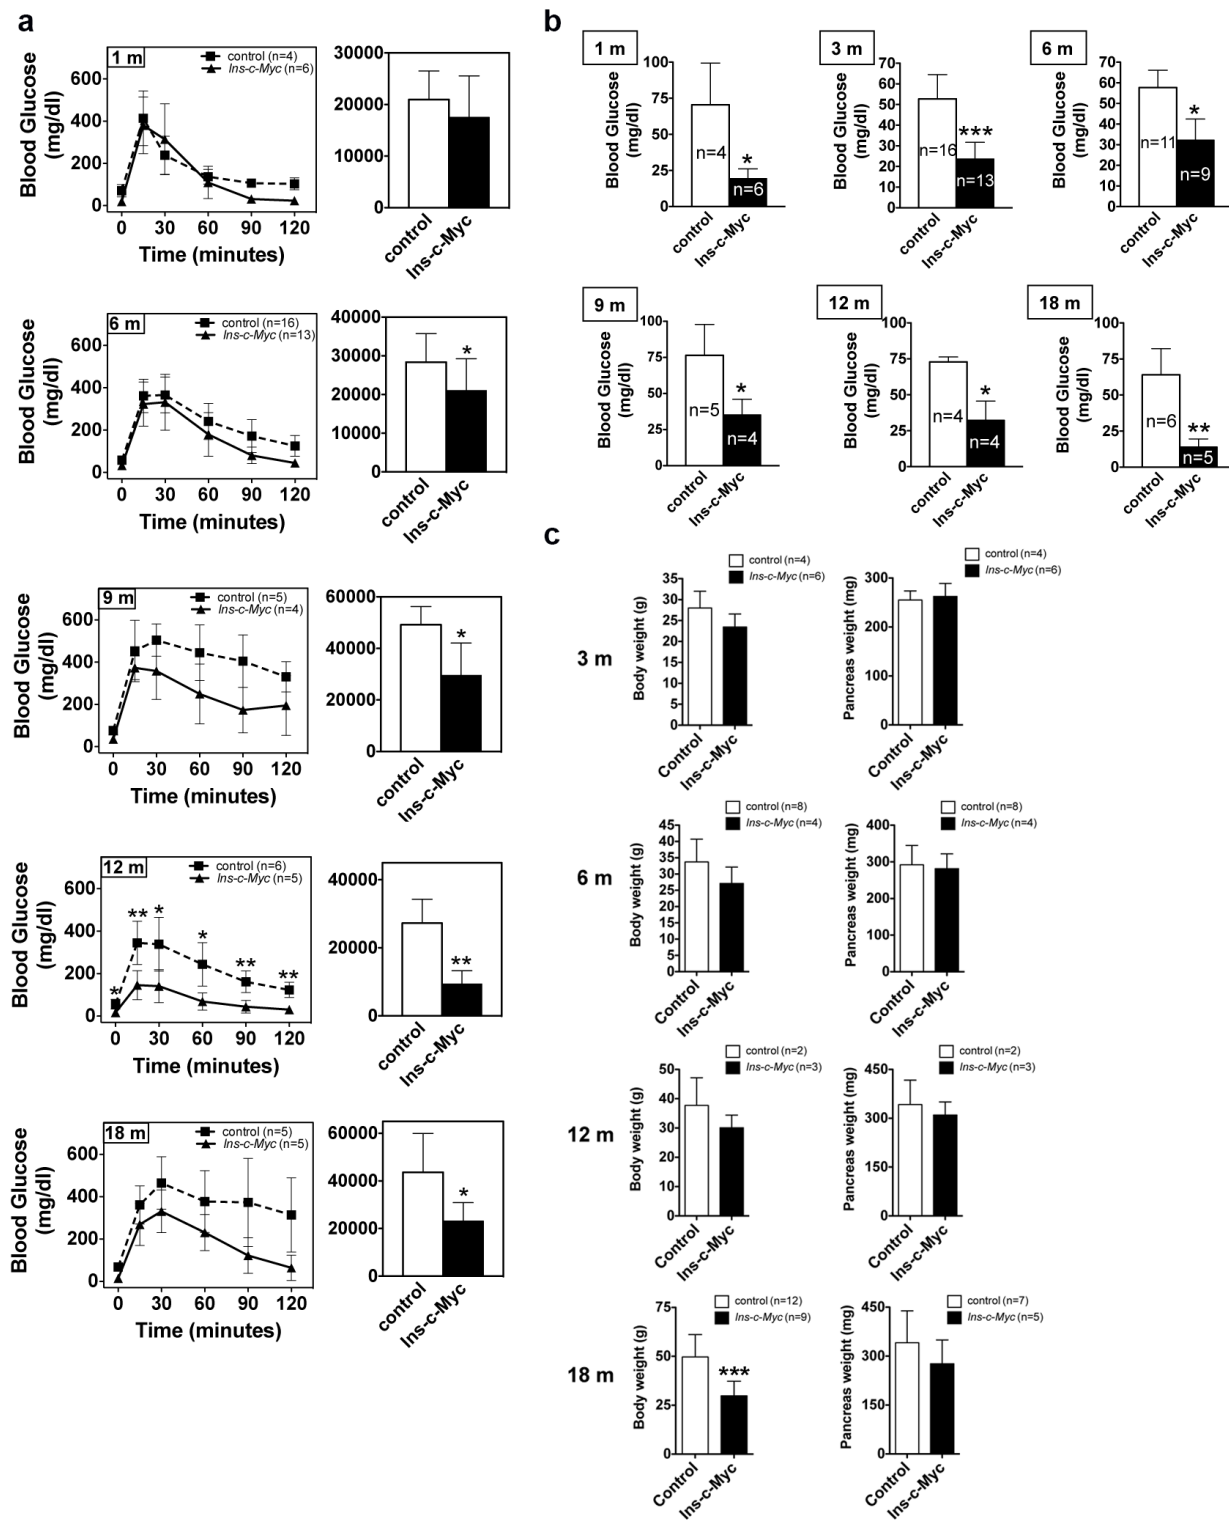

**Supplementary Figure 3.** a. Glucose tolerance tests on mice at the different ages noted in the figure revealed that *Ins-c-Myc* transgenic mice have improved clearance of glucose from the blood throughout their lifespan. The corresponding area under the curve is noted next to the glucose tolerance test. Error bars indicate  $\pm$  SD. \* $p$ ,  $\leq 0.05$ , \*\* $p$ ,  $< 0.005$ , Student's  $t$  test. b. Fasted blood glucose is persistently low in transgenic animals as compared to control littermates in the absence of TAM administration. Error bars indicate  $\pm$  SD. \* $p$ ,  $\leq 0.05$ , \*\* $p$ ,  $< 0.005$ , \*\*\* $p$ ,  $< 0.0005$ , Student's  $t$  test. c. Body weight and pancreas weight measurements for *Ins-c-Myc* transgenic mice and control littermates at the times indicated. Error bars indicate  $\pm$  SD. \* $p$ ,  $< 0.0005$ , Student's  $t$  test.



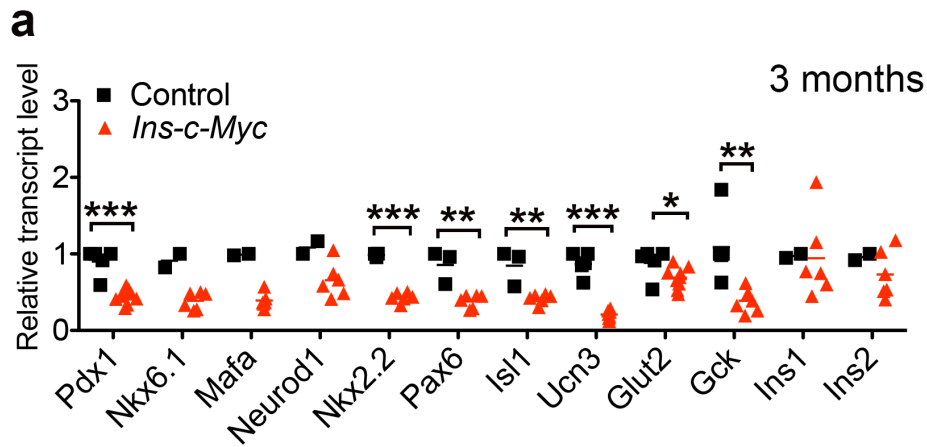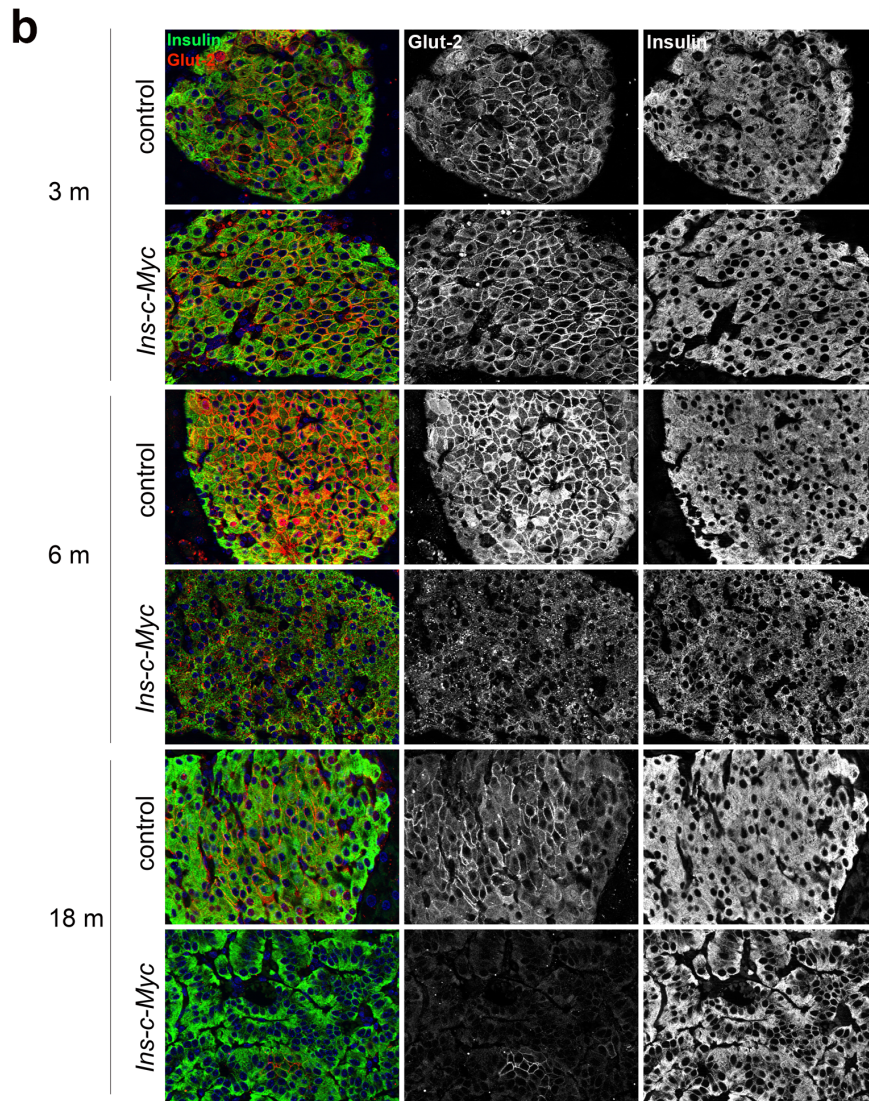

**Supplementary Figure 4.** **a.** QPCR analysis on islets from three-month-old *Ins-c-Myc* animals showed a reduction in the canonical  $\beta$  cell transcription factors including *Pdx1*, *Nkx6.1*, *Mafa*, *Neurod1*, *Nkx2.2*, *Pax6* and *Isl1*. Maturation marker *Ucn3* was also reduced in the transgenic dataset, as was the transporter *Glut-2* and the glucose sensor *Gck*. No significant changes were seen in *Ins1* and *Ins2* expression. Control samples,  $n=2-5$ , transgenic samples,  $n=6-9$ . \* $p<0.05$ , \*\* $p<0.005$ , \*\*\* $p<0.0005$ , Student's  $t$  test. **b.** At three months of age, immunostaining did not reveal changes in the levels of Glut-2. Over time (6 months and 18 months shown), Glut-2 staining was significantly diminished in  $\beta$  cells.



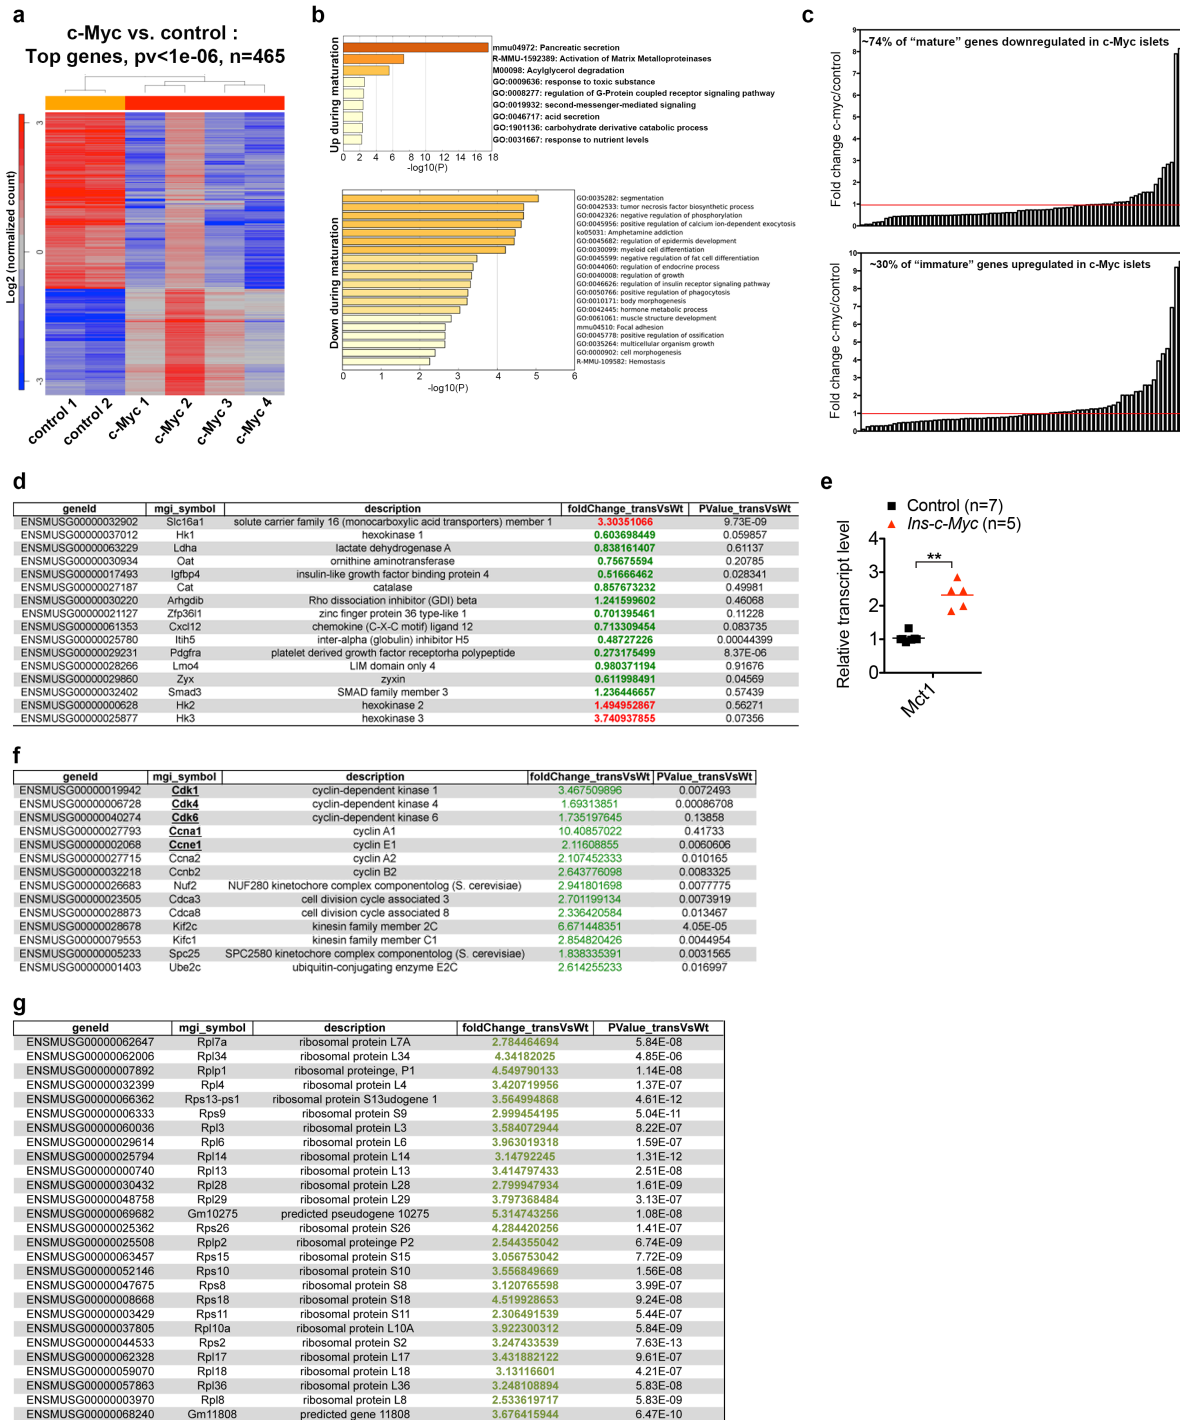

**Supplementary Figure 5.** **a.** Heat map of top differentially expressed genes ( $p$  value  $< 1e-06$ ) between transgenic (*Ins-c-Myc*) and control islets of log2 normalized RNA-seq count data. **b.** Gene ontology (GO) analysis of genes differentially expressed in mature  $\beta$  cells as compared to postnatal islets (P1) from Blum et al. **c.** Analysis of genes differentially expressed in mature  $\beta$  cells as compared to postnatal islets (P1) reveals that the majority of “mature” genes are downregulated in c-Myc  $\beta$  cells. Conversely, ~30% of “immature” genes are upregulated in c-Myc  $\beta$  cells. **d.** Expression levels of disallowed genes in  $\beta$  cells with stabilized c-Myc reveal changes in *Mct1* (*Slc16a1*), *HKII* and *HKIII* (shown in red). **e.** QPCR analysis validates the increased expression of *Mct1* in *Ins-c-Myc* islets ( $n=5$ ) relative to controls ( $n=7$ ) at three months of age.  $**p < 0.005$ , Student’s  $t$  test. **f.** Expression level of cell cycle genes is consistently upregulated in c-Myc  $\beta$  cells. Genes validated at the protein level are in bold and underlined. **g.** A global increase in ribosomal proteins (fold change of transgenic over controls shown in green) was detected in islets isolated from *Ins-c-Myc* animals as compared to control littermates. “logFC” means log2 fold change.

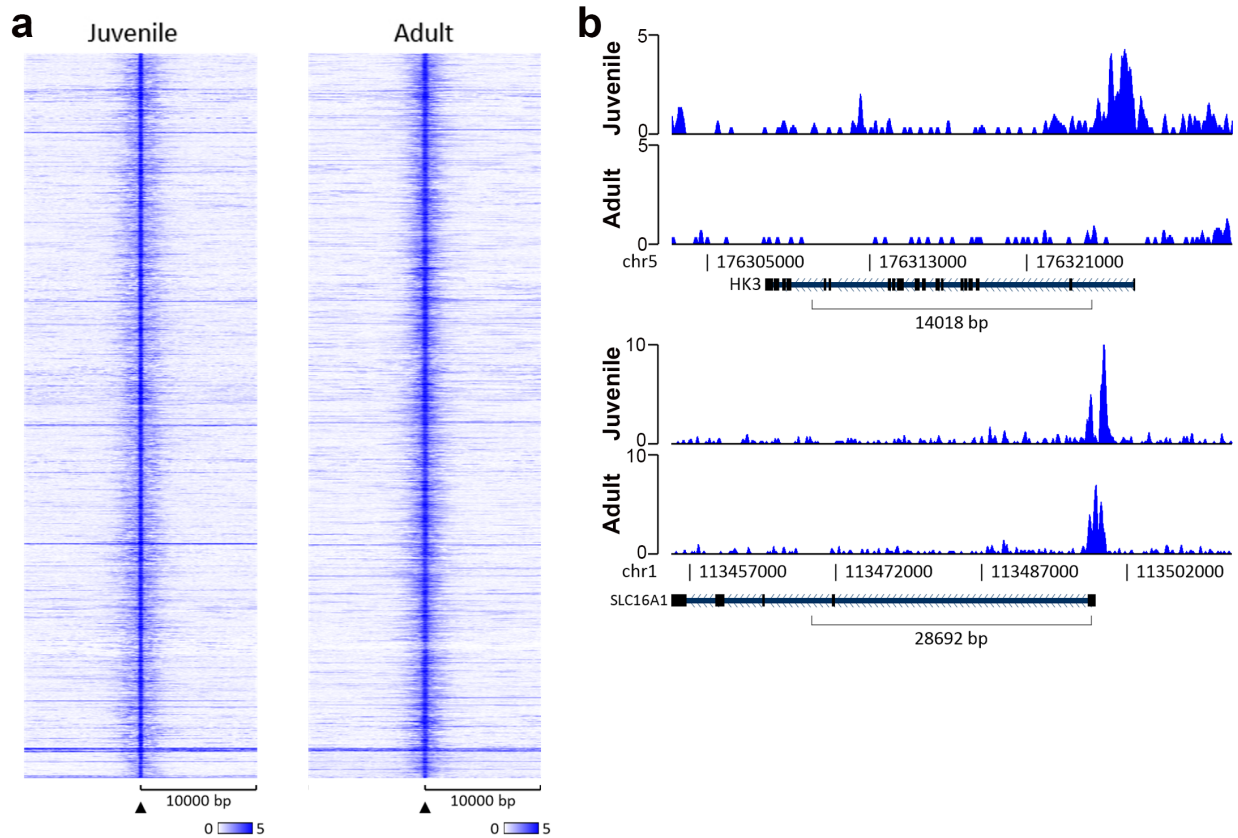

**Supplementary Figure 6.** **a.** Chromatin immunoprecipitation data from juvenile (5 years) and adult (48 years) donors showing the overall landscape of H3K4 trimethylation. Heatmap shows enrichment of H3K4Me3 in juvenile and adult islet datasets. **b.** H3K4 trimethylation is increased in the juvenile (5 years) sample as compared to adult (48 years) at the start sites of the disallowed genes *HK3* and *MCT1*.

**Supplementary Table 1.** Primer sequences used for QPCR and chromatin immunoprecipitation analyses.

| <b>Mouse specific primers</b> |         | <b>Sequence</b>           |
|-------------------------------|---------|---------------------------|
| Pdx1                          | Forward | CGGCTGAGCAAGCTAAGGTT      |
|                               | Reverse | GGAAGAAGCGCTCTCTTTGAAA    |
| Nkx6.1                        | Forward | TCAGGTCAAGGTCTGGTTCCA     |
|                               | Reverse | CGGTCTCCGAGTCCTGCTT       |
| Neurod1                       | Forward | TCCGGTGCCGCTGC            |
|                               | Reverse | GCGAATGGCTATCGAAAGACA     |
| Mafa                          | Forward | GCTGGTATCCATGTCCGTGC      |
|                               | Reverse | TGTTTCAGTCGGATGACCTCC     |
| Ucn3                          | Forward | AAGCCTCTCCCACAAGTTCTA     |
|                               | Reverse | GAGGTGCGTTTGGTTGTCATC     |
| Ccna2                         | Forward | ACCACTGACACCTCTTGAATAT    |
|                               | Reverse | GGTGATTCAAACCTGCCATCCA    |
| Pc1/3                         | Forward | AGGCAGCTGGCGTGTTTG        |
|                               | Reverse | GAAGCTGGTTCCGCTTGGA       |
| c-Myc                         | Forward | GCTCTCCATCCTATGTTGCGG     |
|                               | Reverse | TCCAAGTAACTCGGTCATCATCT   |
| Ki67                          | Forward | CAAGGCGAGCCTCAAGAGATA     |
|                               | Reverse | TGTGCTGTTCTACATGCCCTG     |
| Pcna                          | Forward | ATGCCGTCGGGTGAATTTG       |
|                               | Reverse | TCTCCAATGTGGCTAAGGTCTC    |
| Cdk1                          | Forward | AGTACTTACGGTGTGGTGTAT     |
|                               | Reverse | CTCGCTTTCAAGTCTGATCTTCT   |
| Cdk2                          | Forward | CAAAAACAAGTTGACGGGAGAAG   |
|                               | Reverse | CAGTCTCAGTGTGAGCCG        |
| Cdk4                          | Forward | TCAGCACAGTTCGTGAGGTG      |
|                               | Reverse | TCAGCCGTACAACATTGGGAT     |
| Cdk6                          | Forward | CCTTACCTCGGTGGTCGTC       |
|                               | Reverse | GAACTTCCACGAAAAGAGGGCT    |
| Nkx2.2                        | Forward | AAGCATTTCAAACCGACGGA      |
|                               | Reverse | CCTCAAATCCACAGATGACCAGA   |
| Pax6                          | Forward | GGATCCGGAGGCTGCC          |
|                               | Reverse | CCAAGCTGATTCACTCCGCT      |
| Isl1                          | Forward | ATGATGGTGGTTTACAGGCTAAC   |
|                               | Reverse | TCGATGCTACTTCACTGCCAG     |
| Glut2                         | Forward | AGTGGGCGGAATGGTCG         |
|                               | Reverse | TGCTTTGATCCTTCCAAGTTTGT   |
| Gck                           | Forward | TGCCACCTACGTGCGT          |
|                               | Reverse | TCCCAGGTCTAAAGGAGAGAAAGTC |
| Ins1                          | Forward | CTGCTGGCCCTGCTTGC         |
|                               | Reverse | GGGTCGAGGTGGGCCTT         |
| Ins2                          | Forward | CCTGCTGGCCCTGCTCTT        |
|                               | Reverse | GGCTGGGTAGTGGTGGGTCTA     |
| Mct1                          | Forward | TGTTAGTCGGAGCCTTCATTTT    |
|                               | Reverse | CACTGGTCGTTGCACTGAATA     |
| CyclophilinA                  | Forward | TCACAGAATTATTCCAGGATTCATG |
|                               | Reverse | TGCCGCCAGTGCCATT          |
| <b>Rat specific primers</b>   |         |                           |
| Pdx1                          | Forward | CCCAGCCGCGTTCATCT         |
|                               | Reverse | CCACGCGTGAGCTTTGGT        |
| Nkx6.1                        | Forward | GCGCGCCTTGCCCTGTA         |
|                               | Reverse | TCTTCCCATCTTTGTCCAACAA    |



|                              |         |                        |
|------------------------------|---------|------------------------|
| Mafa                         | Forward | AGGAGGTCATCCGACTGAAACA |
|                              | Reverse | GCGTAGCCGCGGTTCTT      |
| Hnf4a                        | Forward | TGCAGGCAGAGGTCCTGTCT   |
|                              | Reverse | TCGCCATTGATCCCAGAGA    |
| Pax4                         | Forward | ATGCAGCAGGACGGTCTCA    |
|                              | Reverse | GGCCGGCCATTCACAA       |
| Pax6                         | Forward | CAGCCACCACACCTGTCT     |
|                              | Reverse | GTCTGTGCGGCCAACAT      |
| c-Myc                        | Forward | TGTATGTGGAGCGGCTTCTC   |
|                              | Reverse | CCTGGTAAGAGGCCAGCTTC   |
| CyclophilinA                 | Forward | GGTAAAGAAGGCATGAGCAT   |
|                              | Reverse | GCCATTCCTGGACCCAAAA    |
|                              |         |                        |
| <b>QPCR primers for ChIP</b> |         |                        |
| Pcsk1 (-1719)                | Forward | CACCCAACATTGTGTTCTGG   |
|                              | Reverse | GTGCATGGCATAAAGCAAGA   |
| Pcsk1 (-5861)                | Forward | ATGGTGGAAATTGCAAATGG   |
|                              | Reverse | TGGGAAGTTTCCAGCTTCTG   |
| Pdx1 (-193)                  | Forward | GGATCAGGCGACTGAGAGAG   |
|                              | Reverse | ACTGCTCTCCTGGGGAACC    |
| Neurod1 (-375)               | Forward | GTCCGCGGAGTCTCTAACTG   |
|                              | Reverse | GAACCACGTGACCTGCCTAT   |
| Neurod1 (-3838)              | Forward | CACATCAACAACCATGCACA   |
|                              | Reverse | AATAAACGCTGCCAGAGCAC   |
| Neurod1 (-4838)              | Forward | GCTTGCTCTTCCCAGAATCA   |
|                              | Reverse | CCAATCAATTCTCCAGCTGTT  |
| Ins2 (-1562)                 | Forward | TCTCATGGGGGAGAGAAATG   |
|                              | Reverse | CGTCTCCATGAGGAATGACA   |
| Ins2 (-6387)                 | Forward | GCTGGGCAGGAGAGACATAG   |
|                              | Reverse | AATTAGGCAGGCCTCAGGAT   |
