# Supplementary material for: Replication confers β cell immaturity
Source: PubMed Central journal article supplement (PMC5797102; doi:10.1038/s41467-018-02939-0), 2018-02-02
Supplement: 41467_2018_2939_MOESM3_ESM.pdf [file 41467_2018_2939_MOESM3_ESM.pdf]

## **Description of Additional Supplementary Files**

File Name: Supplementary Data 1

Description: Comparison of gene expression after RNA-seq analysis of islets isolated from Ins-c-Myc transgenic islets as well as littermate controls revealed a downregulation of 290 RNAs (red) and upregulation of 175 RNAs (green) in the Ins-c-Myc islets using a nominal p value cutoff at  $10^{-6}$ .
